# Supplementary material
Source: publisher figshare collection journal article supplement (https://sage.figshare.com/ndownloader/files/16636664)
Supplement: Supplementary file 1 [file 16636664]

## SUPPLEMENTARY SECTION

### Supplement 1. National Library of Medicine (PubMed) database search (16.07.2018)

| #   | Query                                                                                                                                                                                                                                                                                                      | Results |
|-----|------------------------------------------------------------------------------------------------------------------------------------------------------------------------------------------------------------------------------------------------------------------------------------------------------------|---------|
| #11 | #10 NOT ("Animals"[Mesh]) NOT "Humans"[Mesh]                                                                                                                                                                                                                                                               | 227     |
| #10 | #8 AND #9                                                                                                                                                                                                                                                                                                  | 298     |
| #9  | #1 AND #2 AND #3                                                                                                                                                                                                                                                                                           | 380     |
| #8  | #6 OR #7                                                                                                                                                                                                                                                                                                   | 752293  |
| #7  | #4 AND #5                                                                                                                                                                                                                                                                                                  | 79226   |
| #6  | (((((("Perfusion Imaging"[Mesh]) OR "Perfusion"[Mesh]) OR perfusion[Title/Abstract]) OR "blood supply" [Subheading]) OR blood supply*[Title/Abstract]) OR Vasculari*[Title/Abstract]) OR viability[Title/Abstract]) OR vitality[Title/Abstract]                                                            | 678017  |
| #5  | (((((("Monitoring, Physiologic"[Mesh]) OR monitor*[Title/Abstract]) OR measure*[Title/Abstract]) OR assess*[Title/Abstract]) OR assist*[Title/Abstract]) OR evaluat*[Title/Abstract]                                                                                                                       | 7245394 |
| #4  | ((("Intraoperative Period"[Mesh]) OR intraoperative*[Title/Abstract]) OR intra-operative*[Title/Abstract]                                                                                                                                                                                                  | 140367  |
| #3  | (((((("Angiography"[Mesh:NoExp]) OR Angiograph*[Title/Abstract]) OR Imaging[Title/Abstract]) OR Image[Title/Abstract]) OR Video[Title/Abstract]) OR Videoangiography[Title/Abstract]                                                                                                                       | 1097590 |
| #2  | ((((((((((("Indocyanine Green"[Mesh]) OR Indocyanine green[Title/Abstract]) OR Indocyanin green[Title/Abstract]) OR ICG[Title/Abstract]) OR Infracyanine green[Title/Abstract]) OR IFC green[Title/Abstract]) OR "Fluorescence"[Mesh]) OR "Fluorescein Angiography"[Mesh]) OR "Fluorescent Dyes"[Mesh]) OR | 529023  |

|    |                                                                                                                                             |       |
|----|---------------------------------------------------------------------------------------------------------------------------------------------|-------|
|    | Fluoresce*[Title/Abstract]) OR near infrared[Title/Abstract]) OR NIRF[Title/Abstract])<br>OR NIR[Title/Abstract])                           |       |
| #1 | ((("Surgical Flaps"[Mesh]) OR "Myocutaneous Flap"[Mesh]) OR "Perforator Flap"[Mesh]) OR "Free Tissue Flaps"[Mesh]) OR Flap*[Title/Abstract] | 88152 |

#11

((((((((((("Surgical Flaps"[Mesh]) OR "Myocutaneous Flap"[Mesh]) OR "Perforator Flap"[Mesh]) OR "Free Tissue Flaps"[Mesh]) OR Flap\*[Title/Abstract]))) AND (((((((((((("Indocyanine Green"[Mesh]) OR Indocyanine green[Title/Abstract]) OR ICG[Title/Abstract]) OR Infracyanine green[Title/Abstract]) OR IFC green[Title/Abstract]) OR "Fluorescence"[Mesh]) OR "Fluorescein Angiography"[Mesh]) OR "Fluorescent Dyes"[Mesh]) OR Fluoresce\*[Title/Abstract]) OR near infrared[Title/Abstract]) OR NIRF[Title/Abstract]) OR NIR[Title/Abstract]))) AND (((((((("Angiography"[Mesh:NoExp]) OR Angiograph\*[Title/Abstract]) OR Imaging[Title/Abstract]) OR Image[Title/Abstract]) OR Video[Title/Abstract]) OR Videoangiography[Title/Abstract]))) AND (((((((((((("Perfusion Imaging"[Mesh]) OR "Perfusion"[Mesh]) OR perfusion[Title/Abstract]) OR "blood supply" [Subheading]) OR blood supply\*[Title/Abstract]) OR Vasculari\*[Title/Abstract]) OR viability[Title/Abstract]) OR vitality[Title/Abstract]))) OR (((((((("Intraoperative Period"[Mesh]) OR intraoperative\*[Title/Abstract]) OR intra-operative\*[Title/Abstract])) AND (((((((("Monitoring, Physiologic"[Mesh]) OR monitor\*[Title/Abstract]) OR measure\*[Title/Abstract]) OR assess\*[Title/Abstract]) OR assist\*[Title/Abstract]) OR evaluat\*[Title/Abstract])")))) NOT (("Animals"[Mesh]) NOT "Humans"[Mesh])

**Supplement 2.** EMBASE (via Ovid SP) search (16.07.2018)

| #   | Query                                                                                                                                                                                                                                                                     | Results  |
|-----|---------------------------------------------------------------------------------------------------------------------------------------------------------------------------------------------------------------------------------------------------------------------------|----------|
| #11 | #9 NOT (exp animal/ not human/)                                                                                                                                                                                                                                           | 265      |
| #10 | #8 AND #9                                                                                                                                                                                                                                                                 | 341      |
| #9  | #1 AND #2 AND #3                                                                                                                                                                                                                                                          | 549      |
| #8  | #6 OR #7                                                                                                                                                                                                                                                                  | 850316   |
| #7  | #4 AND #5                                                                                                                                                                                                                                                                 | 126534   |
| #6  | perfusion.mp. or tissue perfusion/ or perfusion/ or blood supply*.mp. or vascularization/ or vasculari*.mp or viability.mp. or vitality.mp                                                                                                                                | 729600   |
| #5  | monitoring/ or physiologic monitoring/ or monitoring.mp. or monitor*.mp. or measure*.mp. or assess*.mp. or assist*.mp. or evaluation/ or evaluat*.mp.                                                                                                                     | 10889196 |
| #4  | intraoperative monitoring/ or intraoperative period/ or intra-operative*.mp. or intraoperative*.mp.                                                                                                                                                                       | 193821   |
| #3  | angiography/ or angiograph*.mp. or imaging/ or imaging.mp. or image.mp. or video.mp. or videoangiography.mp.                                                                                                                                                              | 2147080  |
| #2  | indocyanine green.mp. or exp indocyanine green/ or ICG.mp. or infracyanine green.mp. or IFC.mp. or fluorescent dye/ or fluorescence imaging/ or fluorescence/ or fluorescence imaging system/ or fluorescein/ or fluoresce*.mp. or near infrared.mp. or NIR.mp.or NIRF.mp | 743086   |
| #1  | surgical flaps.mp. OR exp surgical flaps/ OR myocutaneous flaps.mp. or exp myocutaneous flap/ OR perforator flap.mp. or exp perforator flap/ OR free tissue flaps.mp. or exp free tissue graft/ OR flap*.mp.                                                              | 98264    |

((((surgical flaps.mp. OR exp surgical flaps/ OR myocutaneous flaps.mp. or exp myocutaneous flap/ OR perforator flap.mp. or exp perforator flap/ OR free tissue flaps.mp. or exp free tissue graft/ OR flap\*.mp.) AND (indocyanine green.mp. or exp indocyanine green/ or ICG.mp. or Infracyanine green.mp. or IFC.mp. or fluorescent dye/ or fluorescence imaging/ or fluorescence/ or fluorescence imaging system/ or fluorescein/ or fluoresce\*.mp. or near infrared.mp. or NIR.mp.or NIRF.mp) AND (angiography/ or angiograph\*.mp. or imaging/ or imaging.mp. or image.mp. or video.mp. or videoangiography.mp.)) AND (((intraoperative monitoring/ or intraoperative period/ or intra-operative\*.mp. or intraoperative\*.mp.) AND (monitoring/ or physiologic monitoring/ or monitoring.mp. or monitor\*.mp. or measure\*.mp. or assess\*.mp. or assist\*.mp. or evaluation/ or evaluat\*.mp.)) OR (perfusion.mp. or tissue perfusion/ or perfusion/ or blood supply\*.mp. or vascularization/ or vasculari\*.mp or viability.mp. or vitality.mp)))) not (exp animal/ not human/)

**Supplement 3.** Cochrane Library CENTRAL search (16.07.2018)

| #   | Query                                                                                                                | Results |
|-----|----------------------------------------------------------------------------------------------------------------------|---------|
| #10 | #8 AND #9                                                                                                            | 9       |
| #9  | #1 AND #2 AND #3                                                                                                     | 11      |
| #8  | #6 OR #7                                                                                                             | 29379   |
| #7  | #4 AND #5                                                                                                            | 14683   |
| #6  | (perfusion or blood supply* or vasculari* or viability or vitality):ti,ab,kw                                         | 15159   |
| #5  | (monitor* or measur* or assess* or assist* or evaluat*):ti,ab,kw                                                     | 744643  |
| #4  | (intraoperative* or intra-operative*):ti,ab,kw                                                                       | 19966   |
| #3  | (angiograp* or imag* or video or videoangiography):ti,ab,kw                                                          | 71487   |
| #2  | ("indocyanine green" or ICG or "infracyanine green" or IFC or fluoresc* of "near infrared" or NIR or NIRF) :ti,ab,kw | 949     |
| #1  | flap*:ti,ab,kw                                                                                                       | 3422    |

#10

((flap\*:ti,ab,kw AND ("indocyanine green" or ICG or "infracyanine green" or IFC or fluoresc\* of "near infrared" or NIR or NIRF) :ti,ab,kw AND (angiograp\* or imag\* or video or videoangiography):ti,ab,kw) AND (((intraoperative\* or intra-operative\*):ti,ab,kw AND (monitor\* or measur\* or assess\* or assist\* or evaluat\*):ti,ab,kw) OR (perfusion or blood supply\* or vasculari\* or viability or vitality):ti,ab,kw))

## Supplement 4. Prisma 2009 checklist

| Section/topic             | # | Checklist item                                                                                                                                                                                                                                                                                              | Reported on page #        |
|---------------------------|---|-------------------------------------------------------------------------------------------------------------------------------------------------------------------------------------------------------------------------------------------------------------------------------------------------------------|---------------------------|
| <b>TITLE</b>              |   |                                                                                                                                                                                                                                                                                                             |                           |
| Title                     | 1 | Identify the report as a systematic review, meta-analysis, or both.                                                                                                                                                                                                                                         | Title, p.1                |
| <b>ABSTRACT</b>           |   |                                                                                                                                                                                                                                                                                                             |                           |
| Structured summary        | 2 | Provide a structured summary including, as applicable: background; objectives; data sources; study eligibility criteria, participants, and interventions; study appraisal and synthesis methods; results; limitations; conclusions and implications of key findings; systematic review registration number. | Abstract, p.3             |
| <b>INTRODUCTION</b>       |   |                                                                                                                                                                                                                                                                                                             |                           |
| Rationale                 | 3 | Describe the rationale for the review in the context of what is already known.                                                                                                                                                                                                                              | Introduction pp.4-5       |
| Objectives                | 4 | Provide an explicit statement of questions being addressed with reference to participants, interventions, comparisons, outcomes, and study design (PICOS).                                                                                                                                                  | Introduction, p.5         |
| <b>METHODS</b>            |   |                                                                                                                                                                                                                                                                                                             |                           |
| Protocol and registration | 5 | Indicate if a review protocol exists, if and where it can be accessed (e.g., Web address), and, if available, provide registration information including registration number.                                                                                                                               | No review protocol exists |
| Eligibility criteria      | 6 | Specify study characteristics (e.g., PICOS, length of follow-up) and report characteristics (e.g., years considered, language, publication status) used as criteria for eligibility, giving rationale.                                                                                                      | Methods, p.6              |
| Information sources       | 7 | Describe all information sources (e.g., databases with dates of coverage, contact with study authors to identify additional studies) in the search and date last searched.                                                                                                                                  | Methods, pp.5-6           |
| Search                    | 8 | Present full electronic search strategy for at least one database, including any                                                                                                                                                                                                                            | Supplement 1-3            |

|                                    |    |                                                                                                                                                                                                                        |                           |
|------------------------------------|----|------------------------------------------------------------------------------------------------------------------------------------------------------------------------------------------------------------------------|---------------------------|
|                                    |    | limits used, such that it could be repeated.                                                                                                                                                                           |                           |
| Study selection                    | 9  | State the process for selecting studies (i.e., screening, eligibility, included in systematic review, and, if applicable, included in the meta-analysis).                                                              | Methods, p.6              |
| Data collection process            | 10 | Describe method of data extraction from reports (e.g., piloted forms, independently, in duplicate) and any processes for obtaining and confirming data from investigators.                                             | Methods, p.6              |
| Data items                         | 11 | List and define all variables for which data were sought (e.g., PICOS, funding sources) and any assumptions and simplifications made.                                                                                  | Methods, p.6              |
| Risk of bias in individual studies | 12 | Describe methods used for assessing risk of bias of individual studies (including specification of whether this was done at the study or outcome level), and how this information is to be used in any data synthesis. | /                         |
| Summary measures                   | 13 | State the principal summary measures (e.g., risk ratio, difference in means).                                                                                                                                          | Methods, p.6 and Table 1  |
| Synthesis of results               | 14 | Describe the methods of handling data and combining results of studies, if done, including measures of consistency (e.g., $I^2$ ) for each meta-analysis.                                                              | /                         |
| Risk of bias across studies        | 15 | Specify any assessment of risk of bias that may affect the cumulative evidence (e.g., publication bias, selective reporting within studies).                                                                           | /                         |
| Additional analyses                | 16 | Describe methods of additional analyses (e.g., sensitivity or subgroup analyses, meta-regression), if done, indicating which were pre-specified.                                                                       | /                         |
| <b>RESULTS</b>                     |    |                                                                                                                                                                                                                        |                           |
| Study selection                    | 17 | Give numbers of studies screened, assessed for eligibility, and included in the review, with reasons for exclusions at each stage, ideally with a flow diagram.                                                        | Results, p.8 and Figure 2 |
| Study characteristics              | 18 | For each study, present characteristics for which data were extracted (e.g., study size, PICOS, follow-up period) and provide the citations.                                                                           | Table 1                   |
| Risk of bias within studies        | 19 | Present data on risk of bias of each study and, if available, any outcome level assessment (see item 12).                                                                                                              | /                         |
| Results of individual              | 20 | For all outcomes considered (benefits or harms), present, for each study: (a)                                                                                                                                          | /                         |

|                             |    |                                                                                                                                                                                      |                                  |
|-----------------------------|----|--------------------------------------------------------------------------------------------------------------------------------------------------------------------------------------|----------------------------------|
| studies                     |    | simple summary data for each intervention group (b) effect estimates and confidence intervals, ideally with a forest plot.                                                           |                                  |
| Synthesis of results        | 21 | Present results of each meta-analysis done, including confidence intervals and measures of consistency.                                                                              | /                                |
| Risk of bias across studies | 22 | Present results of any assessment of risk of bias across studies (see Item 15).                                                                                                      | /                                |
| Additional analysis         | 23 | Give results of additional analyses, if done (e.g., sensitivity or subgroup analyses, meta-regression [see Item 16]).                                                                | /                                |
| <b>DISCUSSION</b>           |    |                                                                                                                                                                                      |                                  |
| Summary of evidence         | 24 | Summarize the main findings including the strength of evidence for each main outcome; consider their relevance to key groups (e.g., healthcare providers, users, and policy makers). | Discussion, pp.14-15             |
| Limitations                 | 25 | Discuss limitations at study and outcome level (e.g., risk of bias), and at review-level (e.g., incomplete retrieval of identified research, reporting bias).                        | Discussion, pp.16-17             |
| Conclusions                 | 26 | Provide a general interpretation of the results in the context of other evidence, and implications for future research.                                                              | Discussion and conclusion, p. 17 |
| <b>FUNDING</b>              |    |                                                                                                                                                                                      |                                  |
| Funding                     | 27 | Describe sources of funding for the systematic review and other support (e.g., supply of data); role of funders for the systematic review.                                           | Sources of funding, p.1          |
